# Supplementary material for: Angiotensin-I-Converting Enzyme Inhibitory Activity and Antioxidant Properties of Cryptides Derived from Natural Actomyosin of Catla catla Using Papain
Source: Hindawi journal article supplement (doi:10.1155/2018/9354829), 2018-07-08
Supplement: f1 [file 9354829.f1.pdf]

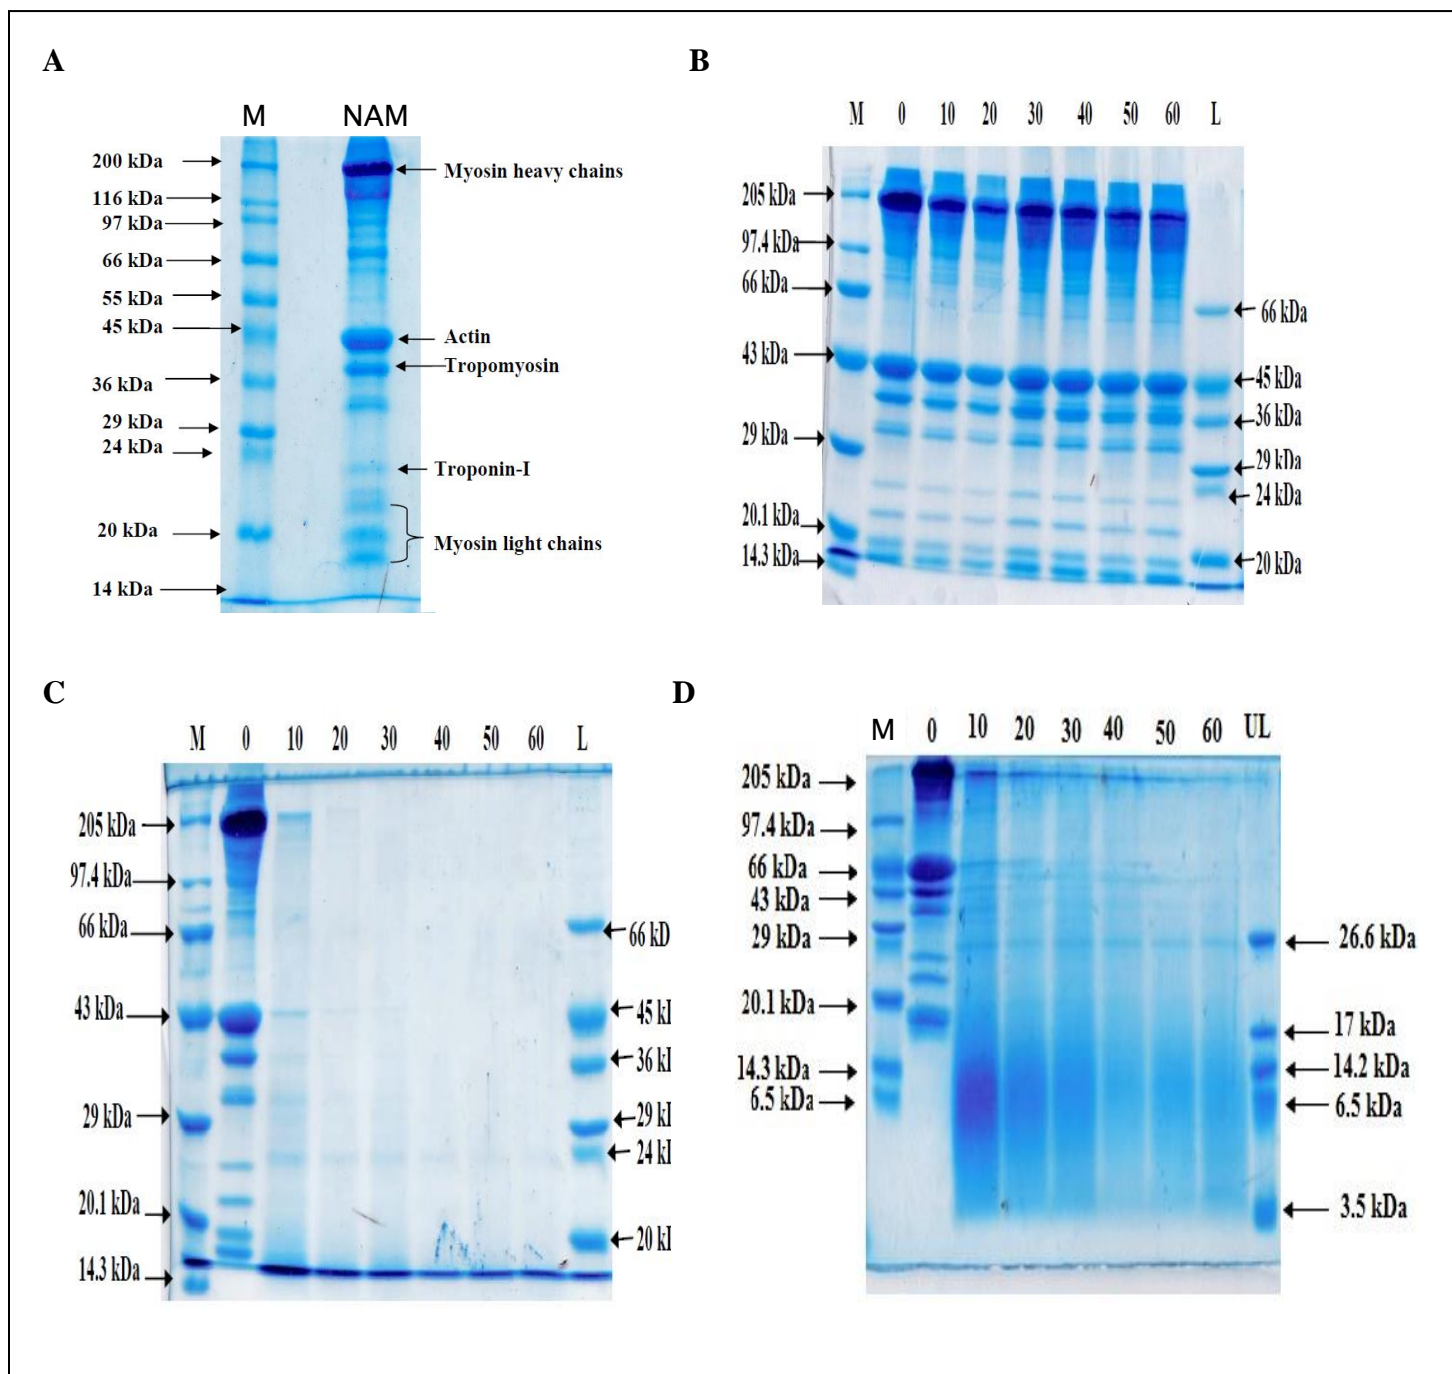

Supplementary Data 1: SDS-PAGE profile of peptides released during hydrolysis of natural actomyosin

(A) Natural actomyosin, (B) control sample during hydrolysis (C) Peptide pattern in 10 % gel and (D) Peptide pattern in 15 % gel
